# Supplementary material for: A review of recent advances and applications of machine learning in tribology
Source: Royal Society of Chemistry journal article supplement (doi:10.1039/d2cp03692d), 2023-01-01
Supplement: d2cp03692d1.pdf [file d2cp03692d1.pdf]

## A Review of Recent Advances and Applications of Machine Learning in Tribology

Abhishek T. Sose, Soumil Y. Joshi, Lakshmi Kumar Kunche, Fangxi Wang, and Sanket A. Deshmukh\*

Department of Chemical Engineering, Virginia Tech, Blacksburg, VA 24061, United States

\*Corresponding author

E-mail address: [sanketad@vt.edu](mailto:sanketad@vt.edu) (Sanket A. Deshmukh)

**Keywords:** Tribology, lubricants and composite design, emerging green lubricants, Machine learning, Data Science

**Table S1.** Table of Content of this article.

| No. | Sections                                          | No. | Subsections                                                                                                                                                                                                                                                                                |
|-----|---------------------------------------------------|-----|--------------------------------------------------------------------------------------------------------------------------------------------------------------------------------------------------------------------------------------------------------------------------------------------|
| 1   | Introduction                                      |     | -                                                                                                                                                                                                                                                                                          |
| 2   | Fundamentals of Tribology                         | 2.1 | Experimental studies of Tribology                                                                                                                                                                                                                                                          |
|     |                                                   | 2.2 | Introduction to machine learning algorithms and their applications                                                                                                                                                                                                                         |
| 3   | A review of the current trends of ML in tribology | 3.1 | ANN in the material formulation of<br>(i) Lubricants<br>(ii) Composites, including<br>(a) polymer matrix composites (PMCs),<br>(b) metal matrix composites (MMCs),<br>(c) ceramic matrix composites (CMCs)<br><br>(3.1.1) ANOVA-assisted ANN<br>(3.1.2) Other ML/optimization-assisted ANN |
|     |                                                   | 3.2 | Recurrent neural networks (RNN) and Principal component analysis based ANN (PCA-ANN)                                                                                                                                                                                                       |
|     |                                                   | 3.3 | Adaptive resonance theory (ART-2) based ANN                                                                                                                                                                                                                                                |
|     |                                                   | 3.4 | Extreme learning machine (ELM)                                                                                                                                                                                                                                                             |
|     |                                                   | 3.5 | Adaptive Neuro-Fuzzy Inference System (ANFIS)                                                                                                                                                                                                                                              |

|   |                                                         |     |                                                |
|---|---------------------------------------------------------|-----|------------------------------------------------|
|   |                                                         | 3.6 | Decision Trees (DT)                            |
|   |                                                         | 3.7 | Random Forests (RF)                            |
|   |                                                         | 3.8 | Support vector machines (SVM)                  |
|   |                                                         | 3.9 | Other multiple ML models                       |
| 4 | Computational methods in tribology                      | 4.1 | Molecular Dynamics (MD)                        |
|   |                                                         | 4.2 | Reactive Molecular Dynamics (RMD)              |
|   |                                                         | 4.3 | Non-equilibrium Molecular Dynamics (NEMD)      |
| 5 | Applications of ML in computational modeling techniques | 5.1 | Our perspective                                |
| 6 | Emerging, new and unexplored tribological materials     | 6.1 | Glyco-Materials (carbohydrate-based materials) |
|   |                                                         | 6.2 | MXenes                                         |

**Table S2.** A tabular representation of applications of ANN to design lubricant materials. Accuracy measure:  $R^2=1$ , MSE = 0, RMSE = 0, and MAE = 0: perfect fitting and accurate predictions can be achieved.

| Oil (s)<br>Mixtures        | Modifiers                      | Input                                                                  | Output    | ANN<br>accuracy | Ref          |
|----------------------------|--------------------------------|------------------------------------------------------------------------|-----------|-----------------|--------------|
| Perfluoropolyether (PFPE)  | Different types of PFPE        | Sliding speed, distance, viscosity, applied load, CoF, and temperature | Wear rate | $R^2 = 0.93$    | <sup>1</sup> |
| Castor oil (NCO), Glycerol | Cashew nut shell liquid (CNSL) | Contents of NCO, CNSL, and glycerol                                    | CoF, WSD  | -               | <sup>2</sup> |
| Vegetable oil              | Rapeseed oil                   | Contents of sunflower                                                  | CoF       | RMSE            | <sup>3</sup> |

|             |                                |                                              |     |                 |   |
|-------------|--------------------------------|----------------------------------------------|-----|-----------------|---|
|             |                                | oil and rapeseed oil                         |     | =0.00099<br>876 |   |
| Mineral oil | Polytetrafluoroethylene (PTFE) | Applied load, sliding velocity, PTFE content | CoF | 98 %            | 4 |

**Table S3.** A tabular representation of applications of ANN to design polymeric composite materials.

| Polymers                                     | Modifiers                                       | Input                                                                                                                                                                                                                                                                                        | Output                                           | Ref |
|----------------------------------------------|-------------------------------------------------|----------------------------------------------------------------------------------------------------------------------------------------------------------------------------------------------------------------------------------------------------------------------------------------------|--------------------------------------------------|-----|
| Polyether ketone (PEK)                       | Short glass fiber (SGF)                         | Impact angle, impact velocity, fiber content                                                                                                                                                                                                                                                 | Erosion rate                                     | 5   |
| Polyamide (PA) 4.6                           | Short carbon fibers (SCFs), PTFE, graphite      | Compressive strength, compression modulus, contraction to failure, tensile strength ( $T_s$ ), strain to failure, impact strength, environmental testing temperature, starting load, average load, average velocity                                                                          | Wear volume                                      | 6   |
| PA 4.6                                       | PTFE, SCF                                       | Polyamide volume, Fiber volume, PTFE volume, compression modulus, compression strength, hardness, fracture toughness, temperatures, normal force, wear speed                                                                                                                                 | Coefficient of determination (B) of CoF and wear | 7   |
| Polyethylene (PE), polyurethane (PUR), Epoxy | Hygrothermally decomposed polyurethane (EP-PUR) | PE: Erosive impact angle, Young's modulus (Y), yield stress, yield strain and fracture energy, as well as the crystallinity (6-25-1)<br>PUR: $T_g$ , damping at $T_g$ , hardness, density, thermal expansion coefficient<br>EP-PUR: wt. % of epoxy and PUR, impact angle, mass flow rate and | Wear rate                                        | 8   |

|                                        |                                         |                                                                                                                                                           |                                                                                              |    |
|----------------------------------------|-----------------------------------------|-----------------------------------------------------------------------------------------------------------------------------------------------------------|----------------------------------------------------------------------------------------------|----|
|                                        |                                         | velocity of erodents.                                                                                                                                     |                                                                                              |    |
| PA 4.6                                 | Glass fiber (GF), CF, PTFE, Graphite    | Content of polymer, fiber and filler, temperature, normal applied force and sliding speed                                                                 | Compressive modulus, compressive strength, $T_s$ , Flexural strength ( $F_s$ ), and SWR, CoF | 9  |
| PA 4.6 and PA 6.6                      | GF, CF, PTFE, Graphite                  | Content of polymer, fiber and filler, temperature, normal applied force and sliding speed                                                                 | Compressive modulus, compressive strength, $T_s$ , $F_s$ and SWR, CoF                        | 10 |
| Polyphenylene sulfide (PPS)            | SCFs, $TiO_2$ particles, Graphite, PTFE | PPS content, Volume of SCF, $TiO_2$ , PTFE, Graphite                                                                                                      | SWR                                                                                          | 11 |
| PPS                                    | SCFs, $TiO_2$ particles, Graphite, PTFE | Material composition (volume fraction of matrix, fillers, reinforcing agents and lubricants), pressure, sliding speed, tensile and compressive properties | SWR and CoF                                                                                  | 12 |
| PPS                                    | SCFs, $TiO_2$ particles, Graphite, PTFE | Content of polymer, SCF, $TiO_2$ , PTFE, and graphite, normal applied force and sliding speed                                                             | SWR and CoF                                                                                  | 13 |
| PPS                                    | SCFs, $TiO_2$ particles, Graphite, PTFE | -                                                                                                                                                         | SWR and CoF                                                                                  | 14 |
| PTFE                                   | CF, $TiO_2$                             | Content of PTFE, CF, $TiO_2$ , sliding speed, applied load, hardness, compressive strength                                                                | Wear                                                                                         | 15 |
| Polyether etherketone composite (PEEK) | 30 wt. % CF                             | $p_v$ factor, sliding temperature                                                                                                                         | CoF, Wear weight loss                                                                        | 16 |
| Epoxy (Araldite)                       | Pine wood dust (PWD)                    | Filler content, sliding speed, and distance, applied normal load                                                                                          | SWR                                                                                          | 17 |

|                                                   |                                                              |                                                                                                           |             |    |
|---------------------------------------------------|--------------------------------------------------------------|-----------------------------------------------------------------------------------------------------------|-------------|----|
| LY 556)                                           |                                                              |                                                                                                           |             |    |
| Epoxy (LY 556)                                    | Rice husk (RH)                                               | RH content, sliding velocity, applied load                                                                | SWR         | 18 |
| Epoxy (LY 556)                                    | SGF, Microsized blast furnace slag (BFS) particles           | Filler content, sliding speed, and distance, applied normal load                                          | SWR         | 19 |
| Polyester                                         | Betelnut fiber                                               | Applied load, sliding distance and fiber orientation                                                      | CoF         | 20 |
| Polyester                                         | Chopped strand mat GF                                        | Applied load, sliding speed, time of test and fiber orientation                                           | CoF         | 21 |
| Polyester                                         | Cotton fiber, fly ash                                        | Content of polyester, cotton fiber, 3 wt. % fly ash and 5 wt. % fly ash                                   | SWR         | 22 |
| Polyester                                         | Waste marble dust (WMD)                                      | Applied load, sliding speed and distance and fiber orientation                                            | SWR         | 23 |
| Polycarbonate                                     | Graphene (GR), Boron carbide (B <sub>4</sub> C)              | Vol. content of polycarbonate, GR, and B <sub>4</sub> C, applied load, and sliding speed                  | SWR and CoF | 24 |
| Polypropylene                                     | Blast furnace slag (BFS)                                     | BFS content, sliding velocity, sliding distance and applied load                                          | SWR         | 25 |
| Ultra high molecular weight polyethylene (UHMWPE) | Carbon nanotube (CNT), CF, graphene oxide (GO), wollastonite | UHMWPE, ZnO, zeolite, CNT, CF, GO, wollastonite, size of ZnO and zeolite, applied load, and sliding speed | Wear volume | 26 |
| PEEK                                              | Silica Carbide (SiC)                                         | Applied load, and sliding speed                                                                           | CoF and SWR | 27 |

**Table S4.** A tabular representation of applications of ANN to design metallic composite materials.

| Metals/Alloy | Modifiers | Input | Output | Ref |
|--------------|-----------|-------|--------|-----|
|--------------|-----------|-------|--------|-----|

|                          |                                                                                            |                                                                                                                                                              |                                                          |    |
|--------------------------|--------------------------------------------------------------------------------------------|--------------------------------------------------------------------------------------------------------------------------------------------------------------|----------------------------------------------------------|----|
| Aluminum                 | Al <sub>2</sub> O <sub>3</sub>                                                             | Operating conditions: Applied load, sliding speed, temperature<br>Material: Hardness, Vol. fraction of Al <sub>2</sub> O <sub>3</sub> and densityfraction of | SWR                                                      | 28 |
| Aluminum (AA2014) alloy  | B <sub>4</sub> C                                                                           | Sliding time, B <sub>4</sub> C volume fraction                                                                                                               | Volume loss, SWR, and surface roughness                  | 29 |
| Co-30Cr-4Mo-1Ni alloy    | Tungsten                                                                                   | Applied load, sliding velocity, sliding distance, tungsten content                                                                                           | Wear loss                                                | 30 |
| Aluminum (AA1100) alloy  | Rice husk ash (RHA), bagasse ash, coconut shell ash, zinc oxide (ZnO), egg shell particles | Applied load, sliding speed, sliding velocity, cumulative time, 6 %<br>Content of one of the ash                                                             | SWR and CoF                                              | 31 |
| Titanium                 | GR, Si <sub>3</sub> N <sub>4</sub>                                                         | Applied load, density, reinforcements                                                                                                                        | SWR                                                      | 32 |
| Aluminum (AA 7075) alloy | Silicon carbide (SiC), Al <sub>2</sub> O <sub>3</sub>                                      | Applied load, sliding speed, material composition                                                                                                            | SWR and CoF                                              | 33 |
| Aluminum (AA 6082) alloy | SiC, TiC, Al <sub>2</sub> O <sub>3</sub> , WC, B <sub>4</sub> C                            | Friction stir welding (FSW) process: Rotational speed, traverse speed, groove width, and ceramic particle                                                    | SWR                                                      | 34 |
| Aluminum-silicon alloy   | Titanium carbide (TiC)                                                                     | Applied load, sliding speed                                                                                                                                  | Wear volume loss, Rise in temperature                    | 35 |
| Aluminum A380 alloy      | Fly ash                                                                                    | Peak current, pulse on, pulse off, Fly ash content %, particle size                                                                                          | Surface roughness, material removal rate, tool wear rate | 36 |
| Copper surface           | SiC, TiC, Al <sub>2</sub> O <sub>3</sub> , WC,                                             | FSW process: Rotational speed, traverse speed, groove width, and                                                                                             | SWR                                                      | 37 |

|                                    |                                |                                                                                                                          |                                    |    |
|------------------------------------|--------------------------------|--------------------------------------------------------------------------------------------------------------------------|------------------------------------|----|
|                                    | B <sub>4</sub> C               | ceramic particle                                                                                                         |                                    |    |
| Aluminum                           | RHA                            | Applied load, sliding speed, RHA particle size, and weight percentage of RHA reinforcement.                              | SWR and CoF                        | 38 |
| Aluminum                           | Red mud nanoparticle           | Composition and deformation of composite, sliding velocity, and applied load                                             | Volumetric wear                    | 39 |
| Zinc–aluminum ZA27                 | Alumina fiber                  | Fiber volume, fiber orientation, and applied load and                                                                    | SWR and CoF                        | 40 |
| Aluminum (A380)                    | Fly ash                        | Applied load, sliding speed, fly ash particle size and content (wt. %)                                                   | SWR and CoF                        | 41 |
| Aluminum alloys                    | Copper, SiC                    | Copper content (wt. %), SiC content (wt. %), Cumulative testing time                                                     | Wear mass loss                     | 42 |
| Aluminum alloys (A356)             | Copper, SiC                    | Manufacturing furnace temperature, applied load, sliding distance, wt. % of SiC                                          | Wear mass loss                     | 43 |
| Aluminum alloys (A356)             | B <sub>4</sub> C               | Sliding distance, particle size and volume percent of B <sub>4</sub> C, and From FEM: Temperature gradient, cooling rate | Weight loss, Variation of porosity | 44 |
| Aluminum silicon alloy (A356)      | SiC                            | SiC wt. %, SiC particle size,                                                                                            | SWR                                | 45 |
| Aluminum alloys (Al7075)           | Al <sub>2</sub> O <sub>3</sub> | Al <sub>2</sub> O <sub>3</sub> wt. %, applied load, sliding distance, density                                            | SWR                                | 46 |
| Aluminum alloys (Al6061)           | Al <sub>2</sub> O <sub>3</sub> | Al <sub>2</sub> O <sub>3</sub> wt. %, applied load, sliding distance, density                                            | SWR                                | 47 |
| Magnesium alloy (RZ-5)             | TiC                            | Applied load, Sliding distance                                                                                           | CoF                                | 48 |
| Nickel-free stainless steel (NFSS) | Hydroxyapatite (HA)            | Applied load, HA content (vol. %), Sliding distance                                                                      | Wear volume loss                   | 49 |

**Table S5.** A tabular representation of applications of ANN combined with ANOVA statistical

analysis to design composite materials.

| Material                | Modifiers                                    | ANN model parameters | Input                                                                                 | Output                                             | Ref           |
|-------------------------|----------------------------------------------|----------------------|---------------------------------------------------------------------------------------|----------------------------------------------------|---------------|
| Polyester               | SGF                                          | 4-10-1               | Filler content, sliding speed, and distance, applied normal load                      | SWR and CoF                                        | <sup>50</sup> |
| Epoxy resins            | Castor oil fiber ( <i>Ricinus communis</i> ) | 3-9-13-9-3           | Applied load, fiber length, sliding distance                                          | Gravimetric wear, CoF, and interfacial temperature | <sup>51</sup> |
| Copper                  | Tungsten                                     | 4-7-4-3              | Tungsten weight content, applied load, sliding distance, and sintering temperature    | CoF, SWR, and hardness                             | <sup>52</sup> |
| Copper                  | Tungsten                                     | 4-140-3              | Tungsten weight content, applied load, sliding distance, and sintering temperature    | CoF, SWR, and hardness                             | <sup>53</sup> |
| Aluminum                | Micro SiC, nano Zirconia                     | 4-10-1               | Sliding speed, zirconia content, applied load, sliding distance                       | Wear loss                                          | <sup>54</sup> |
| Copper (Cu)             | Aluminum nitride, Boron nitride              | 4-7-1                | Volumetric fractions of particles, sliding speed, applied load, and sliding distances | SWR                                                | <sup>55</sup> |
| Al-Si alloy (A356)      | SiC (10 wt. %), Graphite                     | 3-20-30-2            | Applied load, sliding speed and graphite content                                      | SWR and CoF                                        | <sup>56</sup> |
| Aluminum (LM6)          | Powder -chip                                 | 2-5-1                | Sliding distance, Reinforcement                                                       | SWR                                                | <sup>57</sup> |
| Aluminum alloy (Al25Zn) | SiC                                          | 4-8-1                | SiC wt. %, applied load, sliding speed, testing temperature                           | SWR                                                | <sup>58</sup> |
| Copper                  | Multi-walled carbon nanotubes                | 3-7-1                | MWCNT wt. %, sliding distance and applied load                                        | Wear loss                                          | <sup>59</sup> |



|                        |                               |       |                                                                               |     |    |
|------------------------|-------------------------------|-------|-------------------------------------------------------------------------------|-----|----|
|                        | (MWCNTs)                      |       |                                                                               |     |    |
| Magnesium (AZ31) alloy | Reduced graphene oxide (r-GO) | 4-7-1 | Applied load, r-GO weight content, sliding distance, sliding velocity         | SWR | 60 |
| Magnesium (AZ31) alloy | r-GO, SiC                     | 5-8-1 | Applied load, r-GO and SiC weight content, sliding distance, sliding velocity | SWR | 61 |

**Table S6.** A tabular representation of applications of ANN with other ML and optimization algorithms to design composite materials.

| Oil (s) Mixtures                    | Modifiers                                                                                | ML/Optimization algorithm with ANN     | Output            | Ref |
|-------------------------------------|------------------------------------------------------------------------------------------|----------------------------------------|-------------------|-----|
| PTFE resin                          | Aramid pulp, mica, copper (Cu), nano-SiO <sub>2</sub> , potassium titanate whisker (PTW) | Monte-Carlo (MC)                       | CoF and SWR       | 62  |
| ZA-27 alloy                         | Marble dust particles (MDp)                                                              | Improved bat algorithm (IBA)           | Wear              | 63  |
| UHMWPE                              | CNT, GR                                                                                  | Non-sorted Genetic Algorithm (NSGA-II) | Y, T <sub>s</sub> | 64  |
| Coconut oil, castor oil, palm oil   | MWCNT and GR                                                                             | Genetic Algorithm (GA)                 | CoF, WSD          | 65  |
| Castor oil (NCO), mineral oil (CMO) | MWCNT, GR, graphite, ZnO particles                                                       | Genetic algorithm (GA)                 | CoF               | 66  |

|           |                                                                                           |                        |           |    |
|-----------|-------------------------------------------------------------------------------------------|------------------------|-----------|----|
| Polyester | E-glass fiber, cement by-pass dust (CBPD), alumina (Al <sub>2</sub> O <sub>3</sub> ), SiC | Genetic algorithm (GA) | Wear rate | 67 |
|-----------|-------------------------------------------------------------------------------------------|------------------------|-----------|----|

**Table S7.** A tabular representation of applications of other ML techniques to design processes or novel materials.

| Aim/Test/Process                               | Material              | ML algorithm                                      | Accuracy                                                                      | Output                                                                       | Ref |
|------------------------------------------------|-----------------------|---------------------------------------------------|-------------------------------------------------------------------------------|------------------------------------------------------------------------------|-----|
| Dry and base oil bath lubricated Fretting test | Chromium steel        | Recurrent Neural Network (RNN), PCA-ANN           | RNN:<br>PCA-ANN:                                                              |                                                                              | 68  |
| Identify defects in ball bearing               |                       | Adaptive resonance theory (ART-2) based ANN, BPNN | ART-2-ANN:<br>BPNN                                                            |                                                                              | 69  |
| Transesterification process                    | P50S50 biodiesel      | Extreme Learning Machine (ELM)                    | ELM                                                                           |                                                                              | 70  |
| FSW                                            | AA7075 aluminum alloy | Adaptive neuro-fuzzy inference systems (ANFIS)    | RMSE: 9.331                                                                   | Tool pin profile, tool rotary speed, welding speed, and welding axial forces | 71  |
| FSW                                            | Aluminum alloy joints | ANFIS                                             | ANFIS - (RMSE: 29.7 MPa, MAPE: 7.7%);<br>ANN - (RMSE: 36.7 MPa, MAPE: 10.9 %) | Ultimate tensile strength (UTS)                                              | 72  |
| Designing ceramic pairings                     | -                     | Decision trees                                    | R <sup>2</sup> = 0.89                                                         | CoF                                                                          | 73  |
| Sliding                                        | -                     | Random Forests                                    | Accuracy: 0.939                                                               | States of                                                                    | 74  |

|                                                   |                                                                                                                            |                                                                                                                                                     |                                                                                                                                                                                                         |                                          |    |
|---------------------------------------------------|----------------------------------------------------------------------------------------------------------------------------|-----------------------------------------------------------------------------------------------------------------------------------------------------|---------------------------------------------------------------------------------------------------------------------------------------------------------------------------------------------------------|------------------------------------------|----|
| experiments in oscillatory and translatory motion |                                                                                                                            |                                                                                                                                                     |                                                                                                                                                                                                         | operation                                |    |
| Gas face seal status                              | -                                                                                                                          | Support Vector Machines (SVM)                                                                                                                       | $\frac{RSS}{TSE} \leq 0.1$                                                                                                                                                                              | Eccentric load on the stator of the seal | 75 |
| FSW                                               | Aluminum alloy AA1100                                                                                                      | SVM                                                                                                                                                 | Absolute error:<br>(i) SVR: 0.53<br>(ii) BPNN: 3.08<br>(iii) General regression: 13.55                                                                                                                  | UTS                                      | 76 |
| Brakes                                            | -                                                                                                                          | Isotonic regression, SMO, simple linear, linear, Gaussian least median squared regression                                                           | RMSE: 0.0014<br>Correlation coefficient: 0.9999                                                                                                                                                         | CoF                                      | 77 |
| Thin film synthesis                               | Alumina (Al <sub>2</sub> O <sub>3</sub> ), TiO <sub>2</sub> , molybdenum disulphide (MoS <sub>2</sub> ), and aluminum (Al) | MLP-ANN, DT and RF, SVR, age-layered population structure (ALPS), grammatical evolution (GE), and symbolic regression multi-gene programming (SRMG) | -                                                                                                                                                                                                       | -                                        | 78 |
| Aluminum base alloy                               | SiC                                                                                                                        | KNN, SVM, ANN, RF, and GBM                                                                                                                          | MSE of SWR<br>1. ANN = 0.0009<br>2. RF = 0.00001<br>3. kNN = 0.0008<br>4. SVM = 0.0007<br>5. GBM = 0.00002<br><br>MSE of CoF<br>1. ANN = 0.0055<br>2. RF = 0.0028<br>3. kNN = 0.0028<br>4. SVM = 0.0007 | SWR and CoF                              | 79 |

|                   |     |                            |                                                                                                                                                                                                       |             |    |
|-------------------|-----|----------------------------|-------------------------------------------------------------------------------------------------------------------------------------------------------------------------------------------------------|-------------|----|
|                   |     |                            | 5. GBM = 0.0030                                                                                                                                                                                       |             |    |
| Aluminum-graphite | SiC | KNN, SVM, ANN, RF, and GBM | MSE of SWR<br>1. ANN = 0.0031<br>2. RF = 0.0014<br>3. kNN = 0.0017<br>4. GBM = 0.0016<br><br>MSE of CoF<br>1. ANN = 0.0037<br>2. RF = 0.0037<br>3. KNN = 0.0066<br>4. SVM = 0.0064<br>5. GBM = 0.0028 | SWR and CoF | 80 |

**Table S8.** A tabular representation of ML used in combination with computational modeling techniques like MD and DFT.

| Aim/Test/Process                                           | Material                    | ML algorithm                                               | Research outputs       | Ref |
|------------------------------------------------------------|-----------------------------|------------------------------------------------------------|------------------------|-----|
| High throughput screening                                  | Soft matter monolayer films | RF                                                         | CoF and adhesion force | 81  |
| Elastohydrodynamic lubrication                             | Squalane                    | PCA with NEMD simulations                                  | -                      | 82  |
| 2D materials                                               | -                           | Bayesian Model with MD and DFT                             | Maximum energy barrier | 83  |
| Lubricants screening (with surface sliding MD simulations) | Toy model of fluids         | Gaussian mixture model and bayesian neural network with MD | Shear rate             | 84  |

#### Abbreviation List:

|        |                                                       |
|--------|-------------------------------------------------------|
| AE     | Acoustic emissions                                    |
| AIREBO | Adaptive intermolecular reactive empirical bond order |
| GDX    | Adaptive learning rate                                |

|        |                                                             |
|--------|-------------------------------------------------------------|
| ANFIS  | Adaptive neuro-fuzzy inference system                       |
| ART-2  | Adaptive resonance theory                                   |
| Adj SS | Adjusted sum of squares                                     |
| ASTM   | American society for testing and materials                  |
| ANOVA  | Analysis of variance                                        |
| ANN    | Artificial neural network                                   |
| BPNN   | Back propagation neural network                             |
| BA     | Bat algorithm                                               |
| BNN    | Bayesian neural network                                     |
| BFS    | Blast furnace slag                                          |
| BFGS   | Broyden-Fletcher-Goldfarb-Shanno                            |
| CF     | Carbon fiber                                                |
| CNT    | Carbon nanotube                                             |
| CNSL   | Cashew nut shell liquid                                     |
| CBPD   | Cement by-pass dust                                         |
| CVT    | Centroidal Voronoi tessellation                             |
| CMC    | Ceramic matrix composite                                    |
| CG MD  | Coarse grained molecular dynamics                           |
| CoF    | Coefficient of friction                                     |
| CMO    | Commercial mineral oil                                      |
| CNN    | Convolutional neural network                                |
| CC     | Correlation coefficient                                     |
| CFPC   | cotton fiber polyester composite                            |
| DT     | Decision trees                                              |
| DFT    | Density functional theory                                   |
| DBSCAN | Density-based spatial clustering of applications with noise |

|                |                                    |
|----------------|------------------------------------|
| DOE            | Design of experiments              |
| DLC            | Diamondlike carbon                 |
| DTAB           | Dodecyl trimethyl ammonium bromide |
| EHL            | Elastohydrodynamic lubrication     |
| EFI            | Empirical force index              |
| EBP            | Error back propagation             |
| ELM            | Extreme learning machine           |
| FEM            | Finite element method              |
| FF             | Force field                        |
| FM             | Friction modifier                  |
| FSW            | Friction stir welding              |
| FGM            | Functionally graded materials      |
| GA             | Genetic algorithm                  |
| T <sub>g</sub> | Glass transition temperature       |
| GBM            | Gradient boosting machine          |
| GR             | graphene                           |
| GO             | graphene oxide                     |
| GRA            | Gray relational analysis           |
| HA             | Hydroxyapatite                     |
| IBA            | Improved bat algorithm             |
| KNN            | K nearest neighbours               |
| LFM            | Lateral force microscopy           |
| LOO            | Leave one out                      |
| LJ             | Lennard Jones                      |
| LM             | Levenberg–Marquardt                |

|                |                                           |
|----------------|-------------------------------------------|
| LED            | Light emitting diodes                     |
| ML             | Machine Learning                          |
| MDp            | Marble dust particles                     |
| MEB            | Maximum energy barrier                    |
| MAE            | Mean absolute error                       |
| MRE            | Mean relative error                       |
| MSE            | Mean squared error                        |
| MF             | Membership function                       |
| MMC            | Metal matrix composite                    |
| MNN            | Modular neural network                    |
| MD             | Molecular dynamics                        |
| MOSDeF         | Molecular Simulation and Design Framework |
| MC             | Monte carlo                               |
| MWCNT          | Multi walled carbon nanotube              |
| MoGA           | Multi-objectives Genetic Algorithm        |
| MRA            | Multiple regression analyses              |
| NCO            | Neutralized castor oil                    |
| NFSS           | Nickel-free stainless steel composites    |
| Neural network | NN                                        |
| NEMD           | Non-equilibrium molecular dynamics        |
| NSGA           | Non-sorting genetic algorithm             |
| PAES           | Pareto-archived evolution strategy        |
| PFPE           | Perfluoropolyether                        |
| POD            | Pin-on-disk                               |
| PWD            | Pine wood dust                            |
| PEEK           | Poly ether ether ketone                   |

|        |                                                   |
|--------|---------------------------------------------------|
| PA     | Polyamide                                         |
| PEK    | Polyetherketone                                   |
| PE     | Polyethylene                                      |
| PMC    | Polymer matrix composite                          |
| PPS    | Polyphenylene sulfide                             |
| PTFE   | Polytetrafluoroethylene                           |
| EP-PUR | Polyurethane                                      |
| PTW    | Potassium titanate whisker                        |
| PES    | Potential energy surface                          |
| CGB    | Powell–Beale conjugate gradient algorithm         |
| PC     | Principal component                               |
| PCA    | Principal component analysis                      |
| QSTR   | Quantitative structure tribo-ability relationship |
| RBFNN  | radial basis function neural network              |
| RF     | Random forests                                    |
| REBO   | Reactive empirical bond order                     |
| ReaxFF | Reactive force field                              |
| RMD    | Reactive molecular dynamics                       |
| RNN    | Recurrent neural networks                         |
| r-GO   | Reduced graphene oxide                            |
| RSM    | Response surface methodology                      |
| RH     | Rice husk                                         |
| RHA    | Rice husk ash                                     |
| RMSE   | Root mean squared error                           |
| RPM    | Rotations per minute                              |
| SCG    | Scaled conjugate gradient                         |



|                |                                            |
|----------------|--------------------------------------------|
| SCF            | Short carbon fiber                         |
| SGF            | Short glass fiber                          |
| SWR            | Specific wear rate                         |
| SPEA           | Strength pareto evolutionary algorithm     |
| SVM            | Support vector machine                     |
| SVR            | Support vector regression                  |
| SRGM           | Symbolic regression multi-gene programming |
| T <sub>s</sub> | Tensile strength                           |
| TTCF           | Transient-time correlation function        |
| TMDC           | Transition metal dichalcogenide            |
| T-BFRP         | Treated betelnut fiber polyster            |
| UTS            | Ultimate tensile strength                  |
| UHMWPE         | Ultra high molecular weight polyethylene   |
| UA             | United atom                                |
| WMD            | Waste marble dust                          |
| WSD            | Wear scar diameter                         |
| Y              | Young's modulus                            |

## References

- 1 S. P. Jones, R. Jansen and R. L. Fusaro, Preliminary Investigation of Neural Network Techniques to Predict Tribological Properties, *Tribol. Trans.*, 1997, **40**, 312–320.
- 2 S. Bhaumik and M. Kamaraj, Artificial neural network and multi-criterion decision making approach of designing a blend of biodegradable lubricants and investigating its tribological properties, *Proc. Inst. Mech. Eng. Pt. J: J. Eng. Tribol.*, 2021, **235**, 1575–1589.
- 3 C. Humelnicu, S. Ciortan and V. Amortila, Artificial Neural Network-Based Analysis of the Tribological Behavior of Vegetable Oil–Diesel Fuel Mixtures, *Lubricants*, 2019, **7**, 32.
- 4 E. Durak, Ö. Salman and C. Kurbanoğlu, Analysis of effects of oil additive into friction coefficient variations on journal bearing using artificial neural network, *Ind. Lubr. Tribol.*, 2008, **60**, 309–316.
- 5 A. Suresh, A. P. Harsha and M. K. Ghosh, Erosion Studies of Short Glass Fiber-reinforced Thermoplastic Composites and Prediction of Erosion Rate Using ANNs, *J. Reinf. Plast.*

- Compos.*, 2010, **29**, 1641–1652.
- 6 K. Velten, R. Reinicke and K. Friedrich, Wear volume prediction with artificial neural networks, *Tribol. Int.*, 2000, **33**, 731–736.
  - 7 Z. Zhang, K. Friedrich and K. Velten, Prediction on tribological properties of short fibre composites using artificial neural networks, *Wear*, 2002, **252**, 668–675.
  - 8 Z. Zhang, N.-M. Barkoula, J. Karger-Kocsis and K. Friedrich, Artificial neural network predictions on erosive wear of polymers, *Wear*, 2003, **255**, 708–713.
  - 9 Z. Jiang, Z. Zhang and K. Friedrich, Prediction on wear properties of polymer composites with artificial neural networks, *Compos. Sci. Technol.*, 2007, **67**, 168–176.
  - 10 Z. Jiang, L. Gyurova, Z. Zhang, K. Friedrich and A. K. Schlarb, Neural network based prediction on mechanical and wear properties of short fibers reinforced polyamide composites, *Mater. Des.*, 2008, **29**, 628–637.
  - 11 Z. Jiang, L. A. Gyurova, A. K. Schlarb, K. Friedrich and Z. Zhang, Study on friction and wear behavior of polyphenylene sulfide composites reinforced by short carbon fibers and sub-micro TiO<sub>2</sub> particles, *Compos. Sci. Technol.*, 2008, **68**, 734–742.
  - 12 L. A. Gyurova, P. Miniño-Justel and A. K. Schlarb, Modeling the sliding wear and friction properties of polyphenylene sulfide composites using artificial neural networks, *Wear*, 2010, **268**, 708–714.
  - 13 L. A. Gyurova and K. Friedrich, Artificial neural networks for predicting sliding friction and wear properties of polyphenylene sulfide composites, *Tribol. Int.*, 2011, **44**, 603–609.
  - 14 M. Busse and A. K. Schlarb, in *Tribology of Polymeric Nanocomposites (Second Edition)*, eds. K. Friedrich and A. K. Schlarb, Butterworth-Heinemann, Oxford, 2013, pp. 779–793.
  - 15 J. Zhu, Y. Shi, X. Feng, H. Wang and X. Lu, Prediction on tribological properties of carbon fiber and TiO<sub>2</sub> synergistic reinforced polytetrafluoroethylene composites with artificial neural networks, *Mater. Des.*, 2009, **30**, 1042–1049.
  - 16 X. LiuJie, J. P. Davim and R. Cardoso, Prediction on tribological behaviour of composite PEEK-CF30 using artificial neural networks, *J. Mater. Process. Technol.*, 2007, **189**, 374–378.
  - 17 G. Kranthi and A. Satapathy, Evaluation and prediction of wear response of pine wood dust filled epoxy composites using neural computation, *Comput. Mater. Sci.*, 2010, **49**, 609–614.
  - 18 A. Rout and A. Satapathy, Analysis of Dry Sliding Wear Behaviour of Rice Husk Filled Epoxy Composites Using Design of Experiment and ANN, *Procedia Engineering*, 2012, **38**, 1218–1232.
  - 19 P. K. Padhi and A. Satapathy, Analysis of Sliding Wear Characteristics of BFS Filled Composites Using an Experimental Design Approach Integrated with ANN, *Tribol. Trans.*, 2013, **56**, 789–796.
  - 20 U. Nirmal, Prediction of friction coefficient of treated betelnut fibre reinforced polyester (T-BFRP) composite using artificial neural networks, *Tribol. Int.*, 2010, **43**, 1417–1429.
  - 21 T. Nasir, B. F. Yousif, S. McWilliam, N. D. Salih and L. T. Hui, *Proceedings of the Institution of Mechanical Engineers, Part C: Journal of Mechanical Engineering Science*, 2010, **224**, 419–429.
  - 22 H. H. Parikh and P. P. Gohil, in *Durability and Life Prediction in Biocomposites, Fibre-Reinforced Composites and Hybrid Composites*, eds. M. Jawaaid, M. Thariq and N. Saba, Woodhead Publishing, 2019, pp. 301–320.
  - 23 S. K. Nayak and A. Satapathy, Wear analysis of waste marble dust-filled polymer composites with an integrated approach based on design of experiments and neural

- computation, *Proc. Inst. Mech. Eng. Pt. J: J. Eng. Tribol.*, 2020, **234**, 1846–1856.
- 24 M. Zakaulla, F. Parveen, Amreen, Harish and N. Ahmad, Artificial neural network based prediction on tribological properties of polycarbonate composites reinforced with graphene and boron carbide particle, *Materials Today: Proceedings*, 2020, **26**, 296–304.
  - 25 P. K. Padhi, A. Satapathy and A. M. Nakka, Processing, characterization, and wear analysis of short glass fiber-reinforced polypropylene composites filled with blast furnace slag, *J. Thermoplast. Compos. Mater.*, 2015, **28**, 656–671.
  - 26 H. I. Kurt and M. Oduncuoglu, Application of a Neural Network Model for Prediction of Wear Properties of Ultrahigh Molecular Weight Polyethylene Composites, *Int. J. Polym. Sci.*, , DOI:10.1155/2015/315710.
  - 27 G. Zhang, S. Guessasma, H. Liao, C. Coddet and J.-M. Bordes, Investigation of friction and wear behaviour of SiC-filled PEEK coating using artificial neural network, *Surf. Coat. Technol.*, 2006, **200**, 2610–2617.
  - 28 T. S. Mahmoud, Artificial neural network prediction of the wear rate of powder metallurgy Al/Al<sub>2</sub>O<sub>3</sub> metal matrix composites, *Proc. Inst. Mech. Eng. Part L J. Mat. Des. Appl.*, 2012, **226**, 3–15.
  - 29 A. Canakci, S. Ozsahin and T. Varol, Prediction of Effect of Reinforcement Size and Volume Fraction on the Abrasive Wear Behavior of AA2014/B4Cp MMCs Using Artificial Neural Network, *Arab. J. Sci. Eng.*, 2014, **39**, 6351–6361.
  - 30 A. Aherwar, A. Singh and A. Patnaik, Prediction of effect of tungsten filled Co-30Cr-4Mo-1Ni metal matrix biomedical composite alloy on sliding wear peculiarity using Taguchi methodology and ANN, *Advances in Materials and Processing Technologies*, 2017, **3**, 665–688.
  - 31 A. Nagaraj and S. Gopalakrishnan, A Study on Mechanical and Tribological Properties of Aluminium 1100 Alloys 6% of RHAp, BAp, CSAp, ZnOp and Egg Shellp Composites by ANN, *Silicon Chem.*, 2021, **13**, 3367–3376.
  - 32 T. Mutuk, M. Gürbüz and H. Mutuk, Prediction of wear properties of graphene-Si<sub>3</sub>N<sub>4</sub> reinforced titanium hybrid composites by artificial neural network, *Mater. Res. Express*, 2020, **7**, 086511.
  - 33 K. K. Ekka, S. R. Chauhan and Varun, Study on the sliding wear behaviour of hybrid aluminium matrix composites using Taguchi design and neural network, *Proc. Inst. Mech. Eng. Part L J. Mat. Des. Appl.*, 2016, **230**, 537–549.
  - 34 I. Dinaharan, R. Palanivel, N. Murugan and L. R. Frans, Predicting the wear rate of AA6082 aluminum surface composites produced by friction stir processing via artificial neural network, *Multidiscipline Modeling in Materials and Structures*, 2019, **16**, 409–423.
  - 35 V. Sivananth, P. Karuppusamy and K. Lingadurai, Wear and corrosion behaviour of titanium carbide reinforced metal matrix composites for automobile brake disc application, *International Journal of Materials Engineering Innovation*, 2019, **10**, 246–267.
  - 36 V. S. Sreebalaji and K. R. Kumar, Artificial neural networks and multi response optimisation on EDM of aluminium (A380)/fly ash composites, *Int. J. Comput. Mater. Sci. Surface Eng.*, 2016, **6**, 244–262.
  - 37 I. Dinaharan, R. Palanivel, N. Murugan and R. F. Laubscher, Application of artificial neural network in predicting the wear rate of copper surface composites produced using friction stir processing, *Australian Journal of Mechanical Engineering*, 2020, 1–12.
  - 38 S. D. Saravanan and M. Senthilkumar, Prediction of tribological behaviour of rice husk ash reinforced aluminum alloy matrix composites using artificial neural network, *Russian*

- Journal of Non-Ferrous Metals*, 2015, **56**, 97–106.
- 39 G. Satyanarayana, G. Swami Naidu and N. H. Babu, Artificial neural network and regression modelling to study the effect of reinforcement and deformation on volumetric wear of red mud nano particle reinforced aluminium matrix composites synthesized by stir casting, *Bol. Soc. Esp. Ceram. Vidr.*, 2018, **57**, 91–100.
  - 40 K. Genel, S. C. Kurnaz and M. Durman, Modeling of tribological properties of alumina fiber reinforced zinc–aluminum composites using artificial neural network, *Materials Science and Engineering: A*, 2003, **363**, 203–210.
  - 41 K. R. Kumar, K. M. Mohanasundaram, G. Arumaikkannu and R. Subramanian, Artificial neural networks based prediction of wear and frictional behaviour of aluminium (A380)–fly ash composites, *Tribol. Mater. Surf. Interfaces*, 2012, **6**, 15–19.
  - 42 M. Hayajneh, A. M. Hassan, A. Alrashdan and A. T. Mayyas, Prediction of tribological behavior of aluminum–copper based composite using artificial neural network, *J. Alloys Compd.*, 2009, **470**, 584–588.
  - 43 D. Özyürek, A. Kalyon, M. Yıldırım, T. Tuncay and İ. Çiftçi, Experimental investigation and prediction of wear properties of Al/SiC metal matrix composites produced by thixomoulding method using Artificial Neural Networks, *Mater. Des.*, 2014, **63**, 270–277.
  - 44 M. O. Shabani and A. Mazahery, Prediction of wear properties in A356 matrix composite reinforced with B4C particulates, *Synth. Met.*, 2011, **161**, 1226–1231.
  - 45 F. S. Rashed and T. S. Mahmoud, Prediction of wear behaviour of A356/SiCp MMCs using neural networks, *Tribol. Int.*, 2009, **42**, 642–648.
  - 46 R. Pramod, G. B. Veeresh Kumar, P. S. S. Gouda and A. T. Mathew, A Study on the Al<sub>2</sub>O<sub>3</sub> reinforced Al7075 Metal Matrix Composites Wear behavior using Artificial Neural Networks, *Materials Today: Proceedings*, 2018, **5**, 11376–11385.
  - 47 G. B. Veeresh Kumar, R. Pramod, C. S. P. Rao and P. S. S. Gouda, Artificial Neural Network Prediction On Wear Of Al6061 Alloy Metal Matrix Composites Reinforced With - Al<sub>2</sub>O<sub>3</sub>, *Materials Today: Proceedings*, 2018, **5**, 11268–11276.
  - 48 D. Mehra, S. V. Sujith, M. M. Mahapatra and S. P. Harsha, Modeling of wear process parameters of in-situ RZ5-10wt%TiC Composite using artificial neural network, *Materials Today: Proceedings*, 2018, **5**, 24124–24132.
  - 49 M. Younesi, M. E. Bahrololoom and M. Ahmadzadeh, Prediction of wear behaviors of nickel free stainless steel–hydroxyapatite bio-composites using artificial neural network, *Comput. Mater. Sci.*, 2010, **47**, 645–654.
  - 50 Siddhartha and A. K. Singh, Mechanical and dry sliding wear characterization of short glass fiber reinforced polyester-based homogeneous and their functionally graded composite materials, *Proc. Inst. Mech. Eng. Part L J. Mat. Des. Appl.*, 2015, **229**, 274–298.
  - 51 R. Egala, G. V. Jagadeesh and S. G. Setti, Experimental investigation and prediction of tribological behavior of unidirectional short castor oil fiber reinforced epoxy composites, *Friction*, 2021, **9**, 250–272.
  - 52 S. C. Vettivel, N. Selvakumar and N. Leema, Experimental and prediction of sintered Cu–W composite by using artificial neural networks, *Mater. Des.*, 2013, **45**, 323–335.
  - 53 N. Leema, P. Radha, S. C. Vettivel and H. Khanna Nehemiah, Characterization, pore size measurement and wear model of a sintered Cu–W nano composite using radial basis functional neural network, *Mater. Des.*, 2015, **68**, 195–206.
  - 54 S. Arif, M. T. Alam, A. H. Ansari, M. B. N. Shaikh and M. Arif Siddiqui, Analysis of tribological behaviour of zirconia reinforced Al–SiC hybrid composites using statistical and

- artificial neural network technique, *Mater. Res. Express*, 2018, **5**, 056506.
- 55 T. Thankachan, K. Soorya Prakash and M. Kamarthin, Optimizing the Tribological Behavior of Hybrid Copper Surface Composites Using Statistical and Machine Learning Techniques, *J. Tribol.*, , DOI:10.1115/1.4038688.
  - 56 B. Stojanović, A. Vencel, I. Bobić, S. Miladinović and J. Skerlić, Experimental optimisation of the tribological behaviour of Al/SiC/Gr hybrid composites based on Taguchi's method and artificial neural network, *J. Brazil. Soc. Mech. Sci. Eng.*, , DOI:10.1007/s40430-018-1237-y.
  - 57 M. Agarwal, M. Kumar Singh, R. Srivastava and R. K. Gautam, Microstructural measurement and artificial neural network analysis for adhesion of tribolayer during sliding wear of powder-chip reinforcement based composites, *Measurement*, 2021, **168**, 108417.
  - 58 P. P. Ritapure and Y. R. Kharde, SiC contents and pin temperature effect on tribological properties of Al25Zn/SiC composites, *International Journal of Refractory Metals and Hard Materials*, 2019, **82**, 234–244.
  - 59 K. S. Prakash, T. Thankachan and R. Radhakrishnan, Parametric optimization of dry sliding wear loss of copper–MWCNT composites, *Trans. Nonferrous Met. Soc. China*, 2017, **27**, 627–637.
  - 60 V. Kavimani and K. S. Prakash, Tribological behaviour predictions of r-GO reinforced Mg composite using ANN coupled Taguchi approach, *J. Phys. Chem. Solids*, 2017, **110**, 409–419.
  - 61 V. Kavimani, K. S. Prakash and T. Thankachan, Experimental investigations on wear and friction behaviour of SiC@r-GO reinforced Mg matrix composites produced through solvent-based powder metallurgy, *Composites Part B*, 2019, **162**, 508–521.
  - 62 S. Li, M. Shao, C. Duan, Y. Yan, Q. Wang, T. Wang and X. Zhang, *Journal of Applied Polymer Science*, 2019, 136, 47157.
  - 63 S. Gangwar and V. K. Pathak, Dry sliding wear characteristics evaluation and prediction of vacuum casted marble dust (MD) reinforced ZA-27 alloy composites using hybrid improved bat algorithm and ANN, *Materials Today Communications*, 2020, **25**, 101615.
  - 64 A. Vinoth and S. Datta, Design of the ultrahigh molecular weight polyethylene composites with multiple nanoparticles: An artificial intelligence approach, *J. Compos. Mater.*, 2020, **54**, 179–192.
  - 65 S. Bhaumik, B. R. Mathew and S. Datta, Computational intelligence-based design of lubricant with vegetable oil blend and various nano friction modifiers, *Fuel*, 2019, **241**, 733–743.
  - 66 S. Bhaumik, S. D. Pathak, S. Dey and S. Datta, Artificial intelligence based design of multiple friction modifiers dispersed castor oil and evaluating its tribological properties, *Tribol. Int.*, 2019, **140**, 105813.
  - 67 S. S. Mahapatra and A. Patnaik, Study on mechanical and erosion wear behavior of hybrid composites using Taguchi experimental design, *Mater. Des.*, 2009, **30**, 2791–2801.
  - 68 T. Kolodziejczyk, R. Toscano, S. Fouvry and G. Morales-Espejel, Artificial intelligence as efficient technique for ball bearing fretting wear damage prediction, *Wear*, 2010, **268**, 309–315.
  - 69 M. Subrahmanyam and C. Sujatha, Using neural networks for the diagnosis of localized defects in ball bearings, *Tribol. Int.*, 1997, **30**, 739–752.
  - 70 M. A. Mujtaba, H. H. Masjuki, M. A. Kalam, H. C. Ong, M. Gul, M. Farooq, M. E. M. Soudagar, W. Ahmed, M. H. Harith and M. Yusoff, Ultrasound-assisted process

- optimization and tribological characteristics of biodiesel from palm-sesame oil via response surface methodology and extreme learning machine-Cuckoo search, *Renewable Energy*, 2020, **158**, 202–214.
- 71 S. Babajanzade Roshan, M. Behboodi Jooibari, R. Teimouri, G. Asgharzadeh-Ahmadi, M. Falahati-Naghibi and H. Sohrabpoor, Optimization of friction stir welding process of AA7075 aluminum alloy to achieve desirable mechanical properties using ANFIS models and simulated annealing algorithm, *Int. J. Adv. Manuf. Technol.*, 2013, **69**, 1803–1818.
  - 72 M. W. Dewan, D. J. Huggett, T. Warren Liao, M. A. Wahab and A. M. Okeil, Prediction of tensile strength of friction stir weld joints with adaptive neuro-fuzzy inference system (ANFIS) and neural network, *Mater. Des.*, 2016, **92**, 288–299.
  - 73 E. W. Bucholz, C. S. Kong, K. R. Marchman, W. G. Sawyer, S. R. Phillpot, S. B. Sinnott and K. Rajan, Data-Driven Model for Estimation of Friction Coefficient Via Informatics Methods, *Tribol. Lett.*, 2012, **47**, 211–221.
  - 74 J. Prost, U. Cihak-Bayr, I. A. Neacșu, R. Grundtner, F. Pirker and G. Vorlaufer, Semi-Supervised Classification of the State of Operation in Self-Lubricating Journal Bearings Using a Random Forest Classifier, *Lubricants*, 2021, **9**, 50.
  - 75 Y. Yin, X. Liu, W. Huang, Y. Liu and S. Hu, Gas face seal status estimation based on acoustic emission monitoring and support vector machine regression, *Advances in Mechanical Engineering*, 2020, **12**, 1687814020921323.
  - 76 B. Das, S. Pal and S. Bag, *Journal of Manufacturing Processes*, 2017, **27**, 8–17.
  - 77 M. Timur and F. Aydin, Anticipating the friction coefficient of friction materials used in automobiles by means of machine learning without using a test instrument, *Turkish Journal of Electrical Engineering and Computer Sciences*, 2013, **21**, 1440–1454.
  - 78 M. Perčić, S. Zelenika and I. Mezić, Artificial intelligence-based predictive model of nanoscale friction using experimental data, *Friction*, 2021, **9**, 1726–1748.
  - 79 M. S. Hasan, A. Kordijazi, P. K. Rohatgi and M. Nosonovsky, Triboinformatic modeling of dry friction and wear of aluminum base alloys using machine learning algorithms, *Tribol. Int.*, 2021, **161**, 107065.
  - 80 M. S. Hasan, A. Kordijazi, P. K. Rohatgi and M. Nosonovsky, Triboinformatics Approach for Friction and Wear Prediction of Al-Graphite Composites Using Machine Learning Methods, *J. Tribol.*, , DOI:10.1115/1.4050525.
  - 81 C. D. Quach, J. B. Gilmer, D. Pert, A. Mason-Hogans, C. R. Iacovella, P. T. Cummings and C. McCabe, High-throughput screening of tribological properties of monolayer films using molecular dynamics and machine learning, *J. Chem. Phys.*, 2022, **156**, 154902.
  - 82 J. C. S. Kadupitiya and V. Jadhao, Probing the Rheological Properties of Liquids Under Conditions of Elastohydrodynamic Lubrication Using Simulations and Machine Learning, *Tribol. Lett.*, 2021, **69**, 82.
  - 83 B. Sattari Baboukani, Z. Ye, K. G. Reyes and P. C. Nalam, Prediction of Nanoscale Friction for Two-Dimensional Materials Using a Machine Learning Approach, *Tribol. Lett.*, 2020, **68**, 57.
  - 84 M. A. Zaidan, F. F. Canova, L. Laurson and A. S. Foster, Mixture of Clustered Bayesian Neural Networks for Modeling Friction Processes at the Nanoscale, *J. Chem. Theory Comput.*, 2017, **13**, 3–8.
